# Supplementary material for: Astroglial Cell-to-Cell Interaction with Autoreactive Immune Cells in Experimental Autoimmune Encephalomyelitis Involves P2X7 Receptor, β3-Integrin, and Connexin-43
Source: MDPI journal article supplement (doi:10.3390/cells12131786), 2023-07-05
Supplement: s1 [file s1]

## Supplementary Information

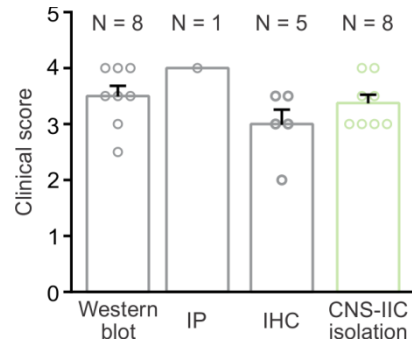

**Supplementary Figure S1. Clinical scores of EAE animals used in experiments.** Graph shows average clinical scores of EAE animals used in Western blot, immunoprecipitation (IP), immunohistochemistry (IHC), and CNS-IIC isolation experiments. CNS-IIC isolation bar comprises  $\text{Ca}^{2+}$  imaging and ATP assay experiments. Data are presented as mean  $\pm$  SEM. Dots represent individual animals. N is the number of animals.

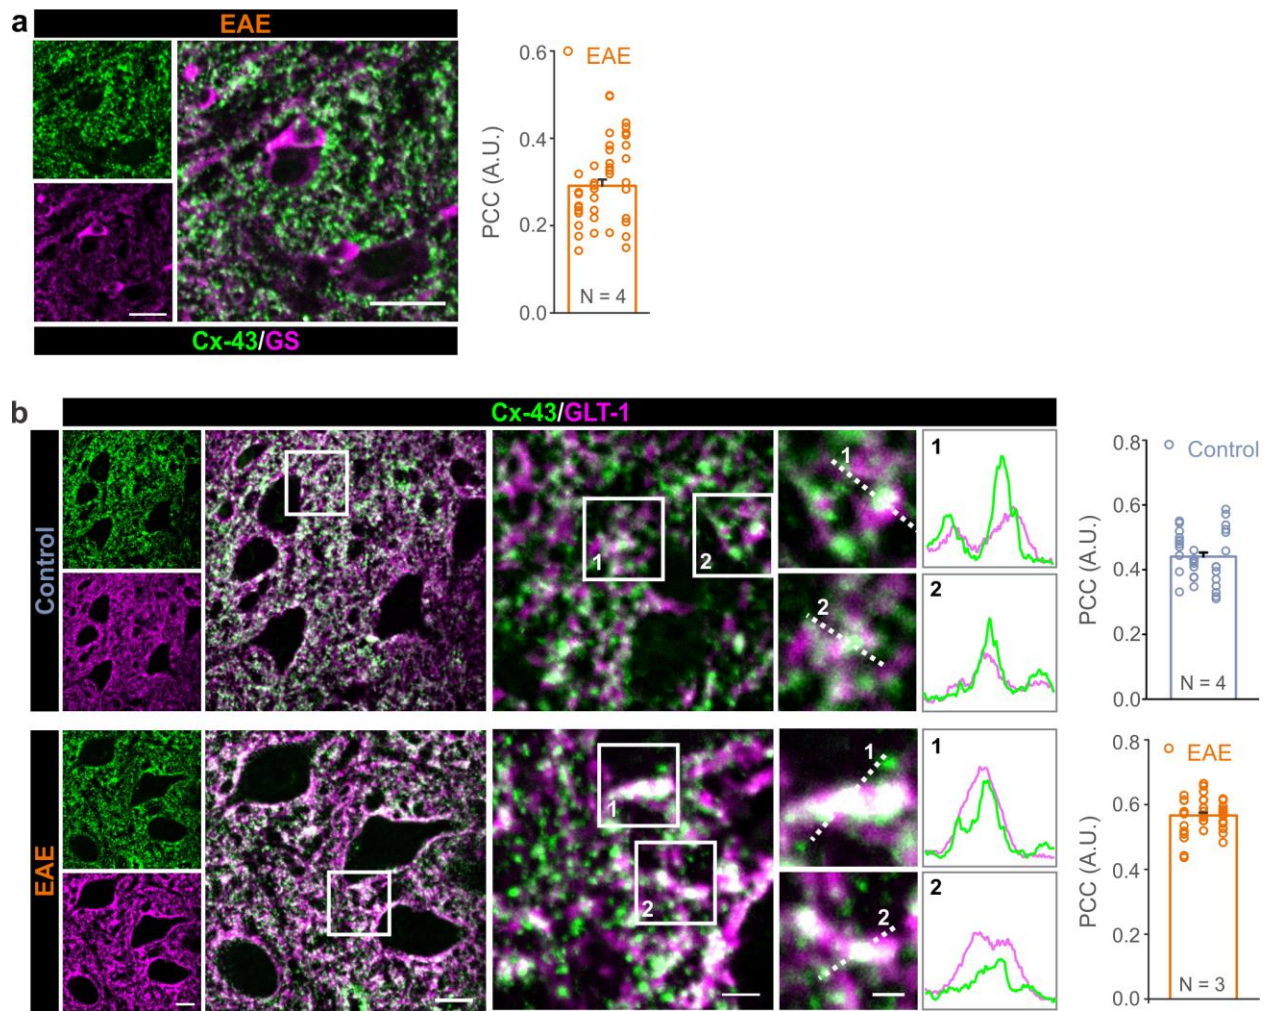

**Supplementary Figure S2. Connexin-43 colocalizes with astrocytic markers glutamine synthetase and glutamate transporter-1.** (a) Left: Confocal images of the lumbar spinal cord grey matter immunostained for connexin-43 (Cx-43, green) and glutamine synthetase (GS, magenta) in EAE. Right: Graph showing Pearson's correlation coefficient (PCC) of colocalization between Cx-43 and GS. (b) Confocal images of the lumbar spinal cord grey matter immunostained for Cx-43 (green) and glutamate transporter-1 (GLT-1, magenta) in Control and EAE. White rectangle corresponds to the enlarged region shown on the right, scale bar 5  $\mu$ m. Numbered (1, 2) rectangles correspond to the regions presented on the right side, scale bar 2  $\mu$ m. Profile intensity plots of Cx-43 and GLT-1 fluorescent signals are measured along each white dotted line. Graphs show PCC of colocalization between Cx-43 and GLT-1 in Control and EAE. N indicates number of analyzed animals. Each vertical dot plot corresponds to the data points obtained from the individual animal. Data are presented as mean  $\pm$  SEM.

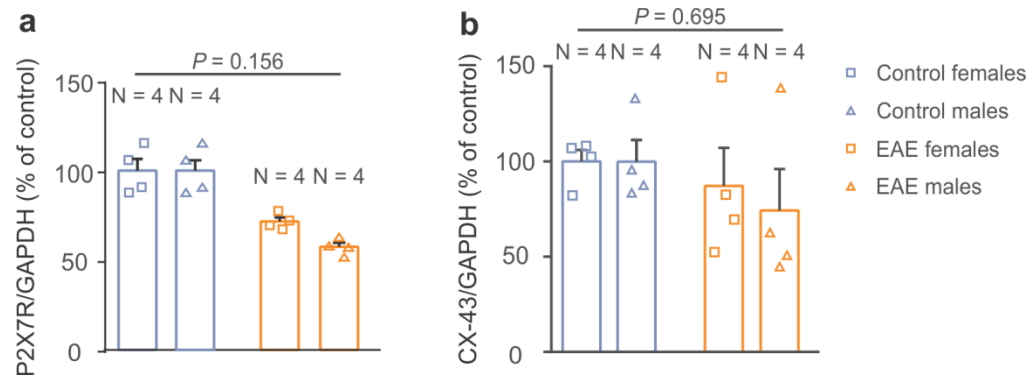

**Supplementary Figure S3. P2X7R and connexin-43 expression in EAE females and males.**

**(a, b)** Graphs showing comparisons of P2X7R (**in a**) and connexin-43 (Cx-43, **in b**) expression in the lumbar spinal cord of female and male rats in control and at the peak of EAE (two-way ANOVA,  $P = 0.156$  for P2X7R and  $P = 0.695$  for Cx-43). Data are shown as mean  $\pm$  SEM. Triangles represent data obtained for individual females, squares for individual males. Number of animals is displayed on the graph.

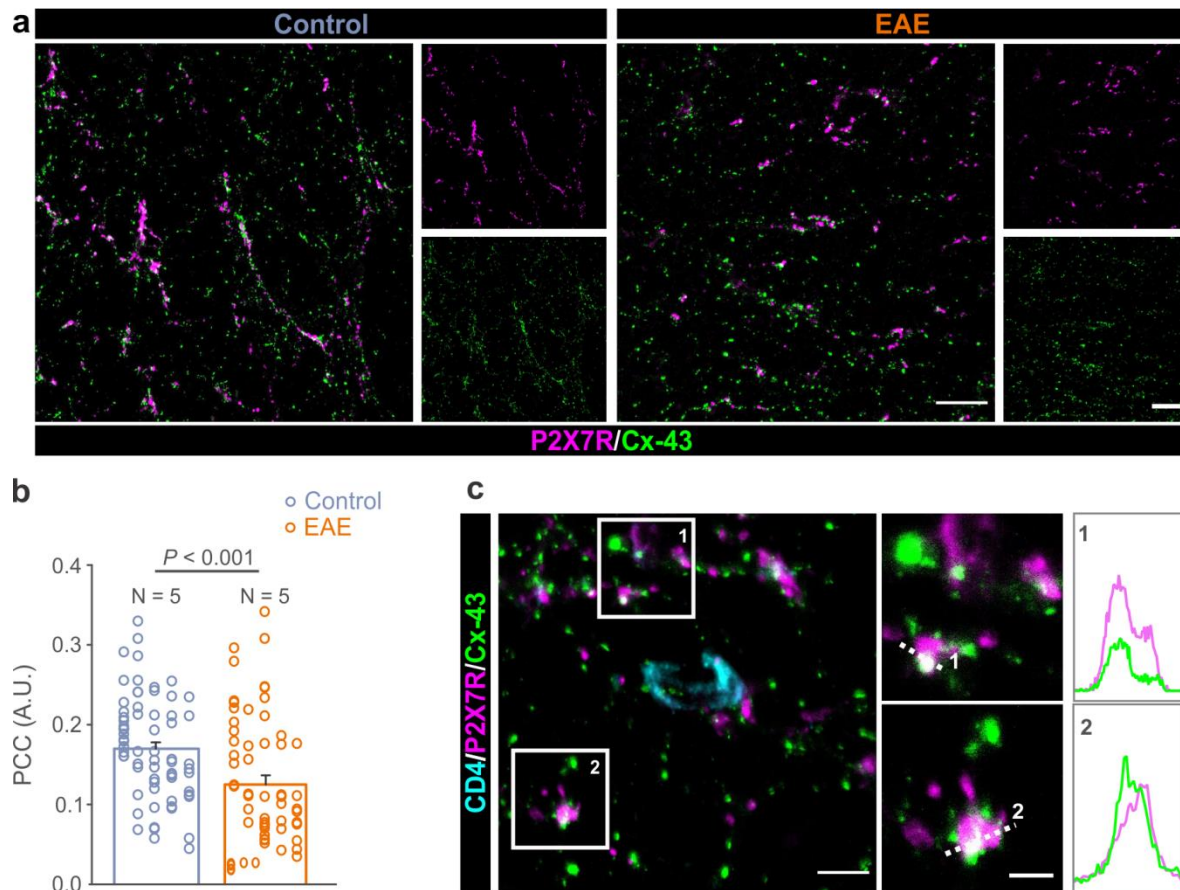

**Supplementary Figure S4. P2X7 receptor colocalization with connexin-43 in the spinal cord white matter in EAE.** (a) Representative confocal images of the spinal cord white matter immunostained for P2X7R (magenta) and connexin-43 (Cx-43, green) in control and EAE. Scale bars 20  $\mu\text{m}$ . (b) Graph showing Pearson correlation coefficient (PCC) between Cx-43 and P2X7R in the white matter in control and EAE (Mann-Whitney Rank Sum Test,  $P < 0.001$ ). N indicates number of animals. Each vertical dot plot corresponds to the data points obtained from the individual animal. Data are presented as mean  $\pm$ SEM. (c) Confocal images of Cx-43 (green) and P2X7R (magenta) fluorescent signals in the close vicinity of infiltrated CD4<sup>+</sup> T cells (cyan) in the white matter of the spinal cord of EAE rats. Scale bar 5  $\mu\text{m}$ . Numbered (1, 2) rectangles correspond to the regions presented on the right side. Scale bar 2  $\mu\text{m}$ . Profile intensity plots of Cx-43 and P2X7R fluorescent signals are measured along each white dotted line.



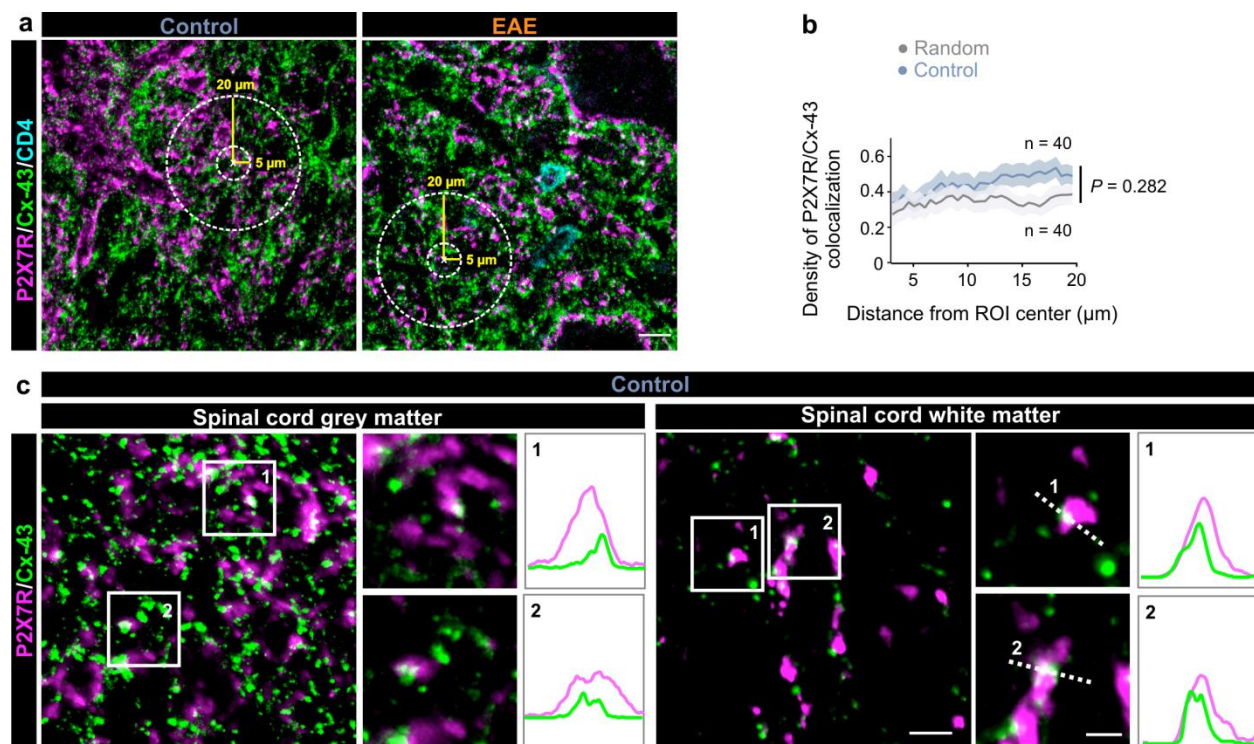

**Supplementary Figure S5. P2X7 receptor colocalization with connexin-43 in the spinal cord of control healthy animal.** (a) Confocal images of P2X7R (magenta), Cx43 (green) and CD4<sup>+</sup> T cell (cyan) immunofluorescent labeling in Control and EAE. Depicted regions of interests (ROI) are used for analysis of P2X7R, Cx-43 signal intensity and colocalization in the random region of interest (ROIs). Yellow and dashed white lines mark 5  $\mu$ m and 20  $\mu$ m radial distances measured from the center of ROIs. Scale bar 10  $\mu$ m. (b) Graph showing density of P2X7R/Cx-43 colocalization in Control (pale blue) and random (grey) ROIs (two-way ANOVA,  $P = 0.282$ ). Data are presented as mean  $\pm$  SEM; n is the number of analyzed ROIs. (c) Confocal images of Cx-43 and P2X7R fluorescent signals in the white and the grey matter of the spinal cord of Control rats. Scale bar 5  $\mu$ m. Numbered (1,2) white rectangles correspond to the regions presented on the right side. Scale bars 2  $\mu$ m. Profile intensity plots of Cx-43 and P2X7R fluorescent signals are measured along each white dotted line.
